# Frequency of variants of hereditary cancer risk syndrome in 1682 Brazilian patients genotyped by next-generation sequencing

Short Title: Variants of hereditary cancer risk in 1682 Brazilian patients

Jarbas Maciel de Oliveira<sup>1,2\*</sup>, Nuria Bengala Zurro<sup>3</sup>, Antonio Victor Campos Coelho<sup>3</sup>, Marcel Pinheiro Caraciolo<sup>3</sup>, Rodrigo Bertollo de Alexandre<sup>3</sup>, George de Vasconcelos Carvalho Neto<sup>3</sup>, Ivana Grivicich<sup>2</sup> and João Bosco de Oliveira Filho<sup>3\*</sup>

<sup>1</sup> Hospital Memorial Arcoverde, Avenida José Bonifácio 1121, Arcoverde, Pernambuco 56503-740, Brazil

<sup>2</sup> Programa de Pós Graduação em Biologia Celular e Molecular Aplicada à Saúde, Universidade Luterana do Brasil, Av. Farroupilha 8001, Canoas - Rio Grande do Sul 92425-020, Brazil

<sup>3</sup> Hospital Israelita Albert Einstein, Avenida Albert Einstein 627, São Paulo 05652-900, Brazil

\* Corresponding author

[jarbasmaciel@yahoo.com.br](mailto:jarbasmaciel@yahoo.com.br) (JMO) or [joao.bosco@einstein.br](mailto:joao.bosco@einstein.br) (JBOF)

**Funding:** This research did not receive any specific grant from funding agencies in the public, commercial, or not-for-profit sectors.

## 1 Abstract

2 Hereditary cancer risk syndromes are a group of disorders caused by germline  
3 variants in a growing number of genes. Most studies on hereditary cancer have  
4 been conducted in white populations. Here we report the largest study in  
5 Brazilian individuals with multiple, self-reported, ethnicities. We genotyped 1682  
6 individuals from all regions of the country who were referred to genetic testing  
7 for hereditary cancer risk with multigene Next-generation sequencing (NGS)  
8 panels. Most were women, and had a personal and/or family history of cancer.  
9 The majority of cancer cases were breast and ovarian. We identified a total of  
10 321 pathogenic/likely pathogenic (P/LP) variants in 305 people (18.1%),  
11 corresponding to 166 unique variants. These variants were distributed among  
12 32 genes, and most were detected on *BRCA1* and *BRCA2* (129 patients, 26.2%  
13 and 14.3% of all P/LP hits, respectively). The prevalence of any genes  
14 transheterozygosity in our sample was 0.89% (15/1682). The *BRCA1/BRCA2*  
15 double heterozygosity rate was 0.78% (1/129) for *BRCA* variants carriers and  
16 0.06% (1/1682) overall. We classified patients according to the NCCN and  
17 Brazilian National Health Agency (ANS) genetic testing recommendation  
18 criteria. We found that the criteria had false negative rates of 17.3% and 44.2%,  
19 meaning that both failed to detect a substantial part of P/LP positive patients.  
20 Therefore, our results show that NGS adds to knowledge on the Brazilian  
21 spectrum of germline variants associated with cancer risk and indicate that  
22 Brazilian testing guidelines should be improved.

23

24 **Keywords:** breast cancer, cancer genomics, familial cancer history, population  
25 genetics, colorectal cancer.

## 26 **Introduction**

27 Hereditary cancer risk syndromes are a group of disorders caused by  
28 germline pathogenic variants in a growing number of genes. They are the main  
29 predisposing factor in about 5-10% of all diagnosed cancers. Accurate genetic  
30 diagnosis in patients with hereditary cancer risk syndromes may reduce  
31 morbidity and mortality by allowing the adoption of specific preventative and  
32 therapeutic measures. Additionally, family members at risk can be tested and  
33 counseled, extending the clinical benefits to many individuals <sup>1</sup>.

34 Currently, there are over 30 hereditary cancer syndromes already  
35 described, the most prevalent being hereditary breast and ovarian cancer  
36 syndrome (HBOC). Other syndromes include Li-Fraumeni, Cowden, Lynch,  
37 Familial Adenomatous Polyposis (APC), multiple Endocrine Neoplasia Type 1  
38 or Wermer's Syndrome (MEN1), multiple Endocrine Neoplasia Syndrome - Type  
39 2 (RET), and Von Hippel-Lindau Syndrome (VHL), to cite the most common.  
40 Most syndromes are inherited in an autosomal-dominant manner, with variable  
41 penetrance, and are caused by mutations in oncogenes or tumor suppressor  
42 genes <sup>2</sup>. Although initially hard to diagnose genetically, the advent of next-  
43 generation sequencing (NGS) has allowed for testing using panels with dozens  
44 to hundreds of genes simultaneously and inexpensively <sup>3</sup>. This has caused a  
45 great increase in the clinical use of these NGS panels, while a growing body of  
46 evidence show their clinical utility as compared to single-gene testing <sup>4,5</sup>.

47           Although large studies have been published on the diagnostic utility of  
48 such panels, these are mostly restricted to white populations. The aim of this  
49 study was to describe the frequency and type of germline pathogenic variants in  
50 cancer susceptibility genes in patients with clinical criteria of hereditary cancer  
51 syndrome by NGS in the genetically admixed Brazilian population.

## 52   **Materials and methods**

### 53   **Inclusion and exclusion criteria**

54           The cohort to the retrospective study included 1682 Brazilian patients  
55 who received a multi-gene NGS panel for risk of hereditary cancer in the  
56 Genomika diagnostics unit, a genetics laboratory of the Albert Einstein Israeli  
57 Hospital (Genomika-Einstein hereafter). As this study took place in a private  
58 diagnostic laboratory this cohort was not specifically selected for any sex, age,  
59 ethnicity, or history of cancer. Both patients with or without criteria for hereditary  
60 risk cancer syndrome were considered. After genetic assessment we classified  
61 patients according to the USA National Comprehensive Cancer Network  
62 (NCCN, [www.nccn.org](http://www.nccn.org)) guidelines: genetic/familial high-risk assessment  
63 versions 3.2019 and 1.2020. Non-Brazilian patients were excluded.

64

### 65   **Research ethics statement**

66           This project was approved by the Institutional review board from the  
67 Research Ethics Committee of the Institute of Integral Medicine Professor  
68 Fernando Figueira (CEP-IMIP) in Recife, Pernambuco and all individuals

69 provided written consent for multi-gene testing (protocol number CAAE  
70 29567220.4.1001.0071).

71

## 72 **Multigene genotyping panel**

73 Genotyping was performed through panels that covered the entire coding  
74 region including 20 bp flanking each exon and noncanonical splice region.

75 Patients were sequenced with panels that ranged from 27 to 78 genes,  
76 including genes mostly associated with hereditary cancer risk, such as *APC*,  
77 *ATM*, *BARD1*, *BMP1A*, *BRCA1*, *BRCA2*, *CDH1*, *CDK4*, *CHEK2*, *EGFR*,  
78 *EPCAM*, *GREM1* *HOXB13*, *MEN1*, *MITF*, *MLH1*, *MRE11A*, *MSH2*, *MSH6*,  
79 *MUTYH*, *NBN*, *PALB2*, *PMS2*, *POLD1*, *POLE*, *PTEN*, *RAD50*, *RAD51C*,  
80 *RAD51D*, *RB1*, *RET*, *SMAD4*, *STK11*, *TP53*, *VHL*. The complete list of genes is  
81 available in the Table A.1).

82

## 83 **Library preparation for NGS**

84 Laboratory procedures were performed at Genomika-Einstein units  
85 (Recife - PE and São Paulo - SP). Genomic DNA was extracted from peripheral  
86 blood or saliva by automation (QIASymphony platform, QIAGEN, Hilden,  
87 Germany) using the DNA Mini Kit extraction kit (QIAGEN). The quality and  
88 quantity of the extracted DNA were assessed by fluorometry (Qubit, Thermo  
89 Fisher, Waltham, Massachusetts). The genomic DNA was enzymatically  
90 fragmented and enriched. The fragments were barcoded via multiplexed PCR  
91 technology by QIAseq Targeted DNA Panels (CDHS 174272-2274 QIAGEN).  
92 The genes were sequenced on MiSeq or Next-Seq 550 instruments (Illumina,

93 San Diego, CA) using MiSeq Reagent Kit v2 (300-cycles) or Next-Seq 550  
94 High-throughput kit (300 cycles) with 100% coverage and 50X minimum depth.  
95

## 96 **Sanger sequencing**

97 In cases where variant confirmation was deemed necessary (low read  
98 depth, complex indels), the genotype was determined by conventional PCR  
99 followed by Sanger sequencing on an ABI 3500 (Thermo Fisher, Waltham,  
100 Massachusetts) automatic sequencer. The variant call was made via the  
101 reference transcript from the ATG initiation codon aligned against the GRCh37 /  
102 hg19 reference genome.

103

## 104 ***Alu* insertion identification**

105 Relevant genetic screenings of breast/ovarian cancer families of  
106 Portuguese ancestry demonstrate that the c.156\_157ins*Alu* variant is the most  
107 frequent *BRCA2* rearrangement. Detection of this variant was performed as  
108 published elsewhere <sup>6</sup> . Briefly, PCR of *BRCA2* exon 3 was performed and the  
109 *Alu* insertion is detected by differential agarose gel electrophoresis.

110

## 111 **Variant classification and bioinformatic analysis**

112 Bioinformatic analysis was performed using GATK 3.0 best practices.  
113 VCFs were annotated using Annovar and in-house databases. The clinical  
114 significance of the variants was determined according to the criteria of the  
115 American College of Genomics and Genetics (ACMG) 2015 guidelines for  
116 sequence variant interpretation and 2018 guideline update <sup>7, 8</sup> . Each variant

117 classification were performed independently by two specialists. Allelic frequency  
118 was examined through access to population databases as Genome  
119 Aggregation Database (gnomAD) <sup>9</sup>, Exome Aggregation Consortium (ExAC) <sup>10</sup>,  
120 and The 1000 Genomes Project <sup>11</sup>. Disease information were upload form  
121 ClinVar <sup>12</sup> and the Leiden Open Variation Database (LOVD) <sup>13</sup>. All variant  
122 information used for classification were updated and upgraded in an in-house  
123 local knowledgebase.

## 124 **Results**

### 125 **Study sample characteristics and cancer histories**

126           Between July 2016 and July 2019, we collected samples and  
127 clinical/demographic characteristics from 1682 Brazilian individuals referred to a  
128 private laboratory to undergo genotyping with a cancer hereditary risk  
129 multigenic panel (Table 1).

130           Among the individuals, 1557 (92.6%) were women with mean age of 47.4  
131  $\pm$  12.3 (range 11-88) years and 125 (7.4%) were men with mean age of 51.4  $\pm$   
132 15.2 (range 14-91) years. Regarding ethnic ancestry, 1007 (59.9%) individuals  
133 reported unknown background, 330 (19.6%) reported having multiple ethnicities  
134 (admixed), 259 (15.4%) white, 26 (1.5%) black, 22 (1.3%) Ashkenazi Jewish, 21  
135 (1.2%) native indigenous and 17 Asian (1.0%) (Table 1).

136           Personal cancer history was reported by 1126 (66.9%) individuals, with  
137 breast or ovary cancers identified in 971 individuals (57.7%); colorectal cancer  
138 in 71 (4.2%); thyroid/parathyroid in 36 (2.1%); prostate cancer in 15 (0.9%);  
139 stomach cancer in 14 (0.8%); uterus, kidney, and sarcomas in 13 each (0.8%);  
140 leukemia in 11 (0.6%); non-melanoma skin and pancreas cancers in 9 each

141 (0.5%); and melanoma in 6 (0.4%). Other types of cancer (lung, liver, bladder,  
142 larynx etc.) were identified in 17 individuals (1.0%). Overall, 268 individuals  
143 (15.9%) did not present malignant neoplasms and for 293 individuals (17.4%)  
144 the history information was not available.

145 Family cancer history (considering first-, second- or third-degree  
146 relatives) was reported by 1182 (70.3%) individuals: 806 (47.9%) reported  
147 breast cancer family history; 310 (23.0%) colorectal cancers; 339 (20.2%)  
148 prostate cancer; 219 (13.0%) head and neck tumors; 172 (10.2%) lung cancer;  
149 155 (9.2%) stomach cancer; 119 (7.1%) breast and ovarian and 48 (2.9%)  
150 ovarian cancer exclusively. No family history was reported by 163 (9.7%)  
151 individuals and 337 (20.0%) did not provide information regarding family history  
152 (Table 1, Table A.2).

153

## 154 **Genetic findings**

155 Pathogenic or likely pathogenic variants were found in 305 (18.1%) of the  
156 1682 individuals. Additionally, 1252 variants of uncertain significance (VUS)  
157 were found in 753 (44.8%) individuals (Fig. 1A, Table A.3). The remaining 624  
158 (37.1%) patients did not present any variants of clinical interest whatsoever  
159 (negatives).

160 The 305 individuals collectively had 321 pathogenic/likely pathogenic  
161 variant hits (corresponding to 166 unique variants) in 32 genes: *APC*, *ATM*,  
162 *BARD1*, *BRCA1*, *BRCA2*, *BRIP1*, *CDH1*, *CDK4*, *CHEK2*, *EPCAM*, *FANCC*,  
163 *MEN1*, *MITF*, *MLH1*, *MRE11A*, *MSH2*, *MSH6*, *MUTYH*, *NBN*, *PALB2*, *PMS2*,  
164 *POLD1*, *PTCH2*, *PTEN*, *RAD50*, *RAD51*, *RAD51C*, *RAD51D*, *RB1*, *RECQL*,  
165 *RET* and *TP53*.



166           The genes that most commonly presented pathogenic or likely  
167 pathogenic variants were *BRCA1* (84/321 = 26.2%), *BRCA2* (46, 14.3%) and  
168 *PALB2* (25, 7.8%). Lynch syndrome genes (*MLH1*, *MSH2*, *MSH6* and *PMS2*)  
169 came next with 17 (5.3%) and were tied with *TP53*, also with 17 (5.3%) hits.  
170 Next came *ATM* (15, 4.7%), *CHEK2* (14, 4.4%), *RAD51C* (9, 2.8%), *RAD51* (8,  
171 2.5%), *RAD50* (7, 2.2%), *BRIP1* (6, 1.9%), *BARD1* (4, 1.2%), *PTEN* (4, 1.2%),  
172 *RAD51D* (4, 1.2%) and *APC* (3, 0.9%). Other genes amounted 17 (3.0%)  
173 variants (*NBN*, *RET*, biallelic *MUTYH*, *MITF*, *CDH1*, *EPCAM*, *FANCC*, *MRE11*,  
174 *POLD1*, *RB1*, *RECQL*, *MEN1*, *CDK4* and *PTCH2*). Moreover, monoallelic  
175 *MUTYH* variants, considered to have low penetrance, were detected in 42  
176 (13.1%) cases (Fig. 1B).

177           In terms of unique variants, we detected 24 in *BRCA1*, 32 in *BRCA2*, 16  
178 in *PALB2*, 16 in the Lynch syndrome genes, eight in *TP53*, 14 in *ATM*, eight in  
179 *CHEK2*, six in *RAD51C*, nine in *RAD51*, two in *RAD50*, six in *BRIP1*, four in  
180 *PTEN*, two in *RAD51*, three in *APC*, two in *NBN*, eight in *MUTYH*, two in *CDH1*  
181 and one each in *BARD1*, *RET*, *MITF*, *EPCAM*, *FANCC*, *MRE11*, *POLD1*, *RB1*,  
182 *RECQL*, *MEN1*, *CDK4* and *PTCH2*.

183           Among the 321 pathogenic/likely pathogenic variant hits, 84 (26.2%)  
184 were point mutations in conserved splice sites, 73 (22.7%) were frameshift  
185 deletions, 65 (20.2%) were missense point mutations, 58 (18.1%) were  
186 nonsense point mutations, 22 (6.9%) were frameshift duplications, 10 (3.1%)  
187 were frameshift insertions, four (1.3%) were frameshift indels, four inframe  
188 deletions (1.3%), and a single inframe insertion (0.3%) (Fig. 1C).

189           Most of the 1252 VUS hits (corresponding to 886 unique variants) were  
190 identified in *ATM* (198 hits, 15.8%), followed by *BRCA2* (86, 6.9%), *MHS6* (63,

191 5.0%), *BRIP1* (55, 4.4%), *RAD50* (52, 4.2%), *CHEK2* (38, 3.0%), *PALB2* (34,  
192 2.7%), *MHS2* (31, 2.5%), *MLH1* (17, 1.4%), *TP53* (17, 1.4%), *BRCA1* (17,  
193 1.4%). Other genes amounted to 644 (51.4%) VUS (Fig. 1D).

## 194 **Individuals with multiple variants (transheterozygotes)**

195       Among the 305 individuals with pathogenic/likely pathogenic variants,  
196 290 (95.1%) were single heterozygotes, 14 (4.6%) presented two variants in  
197 different genes (any two of these: *APC*, *ATM*, *BRCA1*, *BRCA2*, *CDK4*, *CHEK2*,  
198 *MEN1*, *MUTYH*, *PALB2*, *PMS2*, *RAD51*, *RAD51C* or *TP53*) and a single patient  
199 (0.3%) presented three pathogenic variants in different genes (*BRCA1*, *MSH6*  
200 and *MUTYH*). The most common combination in the patients with two variants  
201 was a variant in a high-penetrance gene, such as *BRCA1* and *BRCA2*,  
202 alongside a variant with lower penetrance, such as monoallelic *MUTYH* or in  
203 *CHEK2*. No patients presented more than one pathogenic/likely pathogenic  
204 variants in the same gene (Fig. 2, Table A.4). We observed a single individual  
205 *BRCA1/BRCA2* double heterozygote, making the double heterozygotes  
206 prevalence among *BRCA* variants carriers about 0.78% (1/129) and 0.06%  
207 (1/1682) overall. Thus, the overall transheterozygosity prevalence was about  
208 0.89% (15/1682) in our sample.

209

## 210 **Positivity profiles according to testing criteria of the USA**

### 211 **National Comprehensive Cancer Network and Brazilian National** 212 **Health Agency**

213       The sampled individuals were assessed for hereditary cancer testing  
214 indication according to two sets of clinical criteria: the NCCN for hereditary

215 breast/ovarian, colorectal, stomach or pancreas cancer syndromes, version  
216 3.2019 and 1.2020 and the criteria of the Brazilian National Health Agency  
217 (ANS).

218         Among the 1682 individuals in study, 1008 (59.9%) met NCCN 3.2019  
219 and 1.2020 criteria for testing, 368 (21.9%) did not meet the criteria and 306 did  
220 not have sufficient information for classification. Forty-five patients among the  
221 305 that presented pathogenic/likely pathogenic (positive patients) were in the  
222 last group, leaving 260 classifiable patients. The true positive rate of NCCN  
223 criteria was 215/260 (82.7%) and the false negative rate was 45/260 (17.3%).  
224 The F1-measure was 33.9%. Regarding ANS criteria, 660 (39.2%) met the  
225 criteria for testing, 691 did not meet and 331 did not have sufficient information  
226 for classification. The true positive rate of ANS was 145/260 (55.7%) and the  
227 false negative rate was 115/260 (44.2%), and F1-measure was 31.5% (Table  
228 2).

229         The group of 215 patients fulfilling testing criteria according to the NCCN  
230 had the following genetic profiles: 72 (36.4%) individuals having variants in  
231 *BRCA1*, 29 (14.6%) in *BRCA2*, 16 (8.1%) in *PALB2*, 14 (7.1%) in *TP53*, 11  
232 (5.6%) in *ATM*, 9 (4.5%) in *CHEK2*, 7 (3.5%) in *RAD50* and *RAD51*, 6 (3.5%) in  
233 *RAD51C*, 4 (2.0%) in *MSH6*, 3 (1.5%) in *BRIP1*, *MSH2* and *RAD51D*, 2 (1.0%)  
234 in *APC*, *BARD1* and *CDH1* e 8 (4.0%) in other genes (*MEN1*, *MITF*, *MLH1*,  
235 *NBN*, *PMS2*, *POLD1*, *PTEN* and *RECQL*).

236         The group of 45 patients who did not meet the NCCN criteria had the  
237 following profiles: 9 (20.0%) individuals with variants in *MUTYH*, 7 (16.7%) in  
238 *BRCA2*, 6 (14.3%) in *BRCA1*, 5 (11.9%) in *PALB2*, 2 (4.8%) in *ATM*, *CHEK2*,  
239 *MLH1*, *MSH6*, *PTEN*, *RET* and *TP53*, besides 10 (23.8%) in other genes

240 (*BARD1, BRIP1, CDK4, FANCC, MRE11A, MSH2, PMS2, PTCH2, RAD51* and  
241 *RAD51C*).

242 In summary, both NCCN 1.2020/3.2019 and ANS criteria failed to detect  
243 a substantial part of positive patients. The Brazilian criteria fared even worse,  
244 missing about 44% of positive patients, versus approximately 17% with NCCN  
245 1.2020/3.2019.

246

## 247 **Geographic distribution of variants**

248 We stratified our data according to each Brazilian state. The results are  
249 available in the Table A.5.

## 250 **Discussion**

251 Cancers were the second most common cause of death worldwide in  
252 2018, with 9.6 million deaths (1 every 6 deaths). Lung, prostate, colorectal,  
253 stomach and liver are the most common in men, whereas women are more  
254 affected by breast, colorectal, lung, cervix and thyroid <sup>14</sup>. The Brazilian National  
255 Cancer Institute (INCA) estimates 450,000 new cancer cases per year  
256 (excluding non-melanoma skin cancers) for the 2020-2022 triennium <sup>15</sup>.

257 Most tumors are sporadic, caused by somatic genetic events. However,  
258 about 10% of the patients carry germline pathogenic variants in cancer  
259 predisposition genes such as *BRCA1* or *BRCA2* <sup>1</sup>. The identification of these  
260 patients is of utmost clinical importance because early diagnosis of hereditary  
261 cancer risk syndromes may improve vigilance and treatment. Therefore, genetic  
262 investigation is already a tool of modern oncology <sup>16</sup>.

263 Next generation sequencing (NGS) technologies reduced sequencing  
264 costs allowing rapid, precise, and simultaneous analysis of a great quantity of  
265 genetic material. NGS has been used to identify genetic causes of rare  
266 diseases and cancers, in clinical and research settings. Previously, patients in  
267 investigation of HBOC or Lynch syndrome risk would be genotyped by limited,  
268 specific panels. Nowadays, as NGS is being largely utilized by clinical  
269 laboratories, the patients may undergo genotyping by multigenic panels that  
270 allow a better stratification as well as personalized oncologic management <sup>17</sup>.

271 Here, we report the results of our study, the largest conducted in Brazil,  
272 with 1682 individuals that underwent genotyping with 27- to 78-genes panels  
273 intended to detect germinative variants in cancer predisposition genes. Women  
274 are the majority in our sample (92.6%). Consequently, the most prevalent  
275 cancers were breast and ovarian (57.7%), colorectal (4.2%) and  
276 thyroid/parathyroid (2.1%).

277 The overall positivity rate was 18.1% (305/1682 individuals); 16.0%  
278 (269/1682) if individuals with monoallelic *MUTYH* variants are excluded.  
279 Considering just *BRCA1/BRCA2* pathogenic/likely pathogenic variants, the  
280 positivity rate was only 7.7% (129/1682 individuals). This demonstrates the  
281 importance of NGS multigene panels: it reduces the rate of false negatives,  
282 providing more information for oncologic management and prognosis.

283 The *BRCA* pathogenic variants positivity rate from our study seems low,  
284 but it is not unexpected since our cohort was not specifically selected for any  
285 sex, age, ethnicity, or history of cancer. Indeed, since there is significant allelic  
286 heterogeneity in *BRCA* genes, there is great variability in positivity rates in other  
287 studies <sup>18</sup>. In Brazil, studies of HBOC patients observed positivity rates between

288 1.3%<sup>19</sup> and 27.3%<sup>20</sup>. In other countries, the positivity rate among sporadic and  
289 high-risk hereditary cancer cases varied between 2.6% in the USA<sup>21</sup> and 27.9%  
290 in Japan<sup>22</sup> (reviewed in<sup>23</sup>). Therefore, our positivity rate is indeed within these  
291 ranges.

292 We compared the mutational profile of *BRCA1* and *BRCA2* genes we  
293 observed with other 20 Brazilian studies. Among the 56 variants we detected,  
294 33 (19 in *BRCA1* and 14 in *BRCA2*) were recurrent in other studies. The five  
295 most recurrent variants were: *BRCA1*:c.5266dupC, found by other 18 studies<sup>18,</sup>  
296 <sup>20, 24-39</sup>, *BRCA1*:c.3331\_3334delCAAG, found in other 12 studies<sup>18, 20, 24, 27, 29, 31,</sup>  
297 <sup>32, 34, 35, 37, 39, 40</sup>, *BRCA2*:c.2808\_2811delACAA found in other seven studies<sup>18,</sup>  
298 <sup>29-31, 34, 35, 39</sup>, *BRCA1*: c.1687C>T found in six studies<sup>26, 31, 32, 34, 35</sup> and  
299 *BRCA1*:c.211A>G found in other five studies<sup>35-38, 40</sup>.

300 The five most prevalent *BRCA1* mutations among the individuals  
301 sampled by our study were c.5266dupC, c.5074+2T>C, c.3331\_3334delCAAG,  
302 c.1687C>T and c.211A>G. These results partially agree with a worldwide  
303 survey that included Brazilian families of women carriers of *BRCA* pathogenic  
304 variants. Rebbeck et al. (2018)<sup>41</sup> surveyed 101 Brazilian families and observed  
305 c.5266dupC, c.3331\_3334delCAAG and c.1687C>T among the five most  
306 prevalent *BRCA1* mutations. Therefore, our results agree with three variants.

307 The five most prevalent *BRCA2* variants in our patients were  
308 c.2808\_2811delACAA, c.9382C>T, c.6024dupG, c.8488-1G>A and  
309 c.5216dupA. Only c.2808\_2811delACAA was in common with the Rebbeck et  
310 al. results<sup>41</sup>. Interestingly, they observed c.156\_157insAlu among the five most  
311 prevalent variation among 49 Brazilian families, but our results place it in sixth  
312 place, tied with other variants.

313           The recurrence in independent samples from Brazil indicate the variants  
314 are representative of the *BRCA1* and *BRCA2* mutational spectrum in Brazil.  
315 Indeed, the *BRCA1*:c.5266dupC and *BRCA2*:c.156\_157insAlu (found in other  
316 four studies <sup>31, 34, 35, 42</sup>) variants are considered as founder mutations coming  
317 from European populations and may be found in the individuals from all regions  
318 of Brazil <sup>35</sup>. Indeed, we detected *BRCA1*: c.5266dupC in individuals from  
319 Pernambuco and Alagoas, Northeast Brazil states, as well as in São Paulo  
320 (Southeast) and Paraná (South) and *BRCA2*:c.156\_157insAlu was detected in  
321 an individual from Piauí, also a Northeast state.

322           We also observed some recurrent pathogenic variants in other genes:  
323 *TP53*:c.1010G>A, found in four other studies <sup>20, 38-40</sup>, *CHEK2*:c.349A>G, found  
324 in two other studies <sup>38, 43</sup>; *MUTYH*:c.1147delC <sup>43</sup>; *MUTYH*:c.1187G>A <sup>38</sup>,  
325 *MSH2*:c.2152C>T <sup>44</sup>; *MSH6*:c.3848\_3862del <sup>45</sup>, *MLH1*:c.677G>A <sup>44</sup> and  
326 *PALB2*:c.2257C>T <sup>46</sup>. These observations could mean that these variants are  
327 important co-players alongside the recurrent *BRCA* variants in the risk of  
328 hereditary cancers in Brazilian populations.

329           Transheterozygosity, i.e. heterozygosity at two different loci <sup>47</sup>, is rare  
330 among patients at risk of hereditary cancers. The prevalence of double  
331 heterozygosity among *BRCA1/BRCA2* carriers ranges between 1.8% and  
332 1.85% <sup>48, 49</sup> in the Jewish Ashkenazi populations. Among non-Ashkenazi  
333 Europeans, the prevalence is lower, between 0.22% and 0.87% <sup>48</sup>. An Italian  
334 study reported 0.62% <sup>50</sup> and a Korean study reported 1.2% <sup>51</sup>. Therefore, our  
335 estimate of 0.78% in the Brazilian sample seems plausible.

336           There has been controversy regarding the consequences over the  
337 phenotype of *BRCA1/BRCA2* double heterozygote. Earlier reports suggest that



338 they do not have worse phenotypes when comparing to single-variant carriers  
339 <sup>52, 53</sup>. Bell et al. (2002) <sup>54</sup> analyzed three independent samples of tumor tissue  
340 from the same *BRCA1/BRCA2* double heterozygote patient and observed that  
341 either one or other gene had suffered loss of heterozygosity (LOH) genetic  
342 events, suggesting that both genes are functionally equivalent in initiating  
343 tumorigenesis in breast tissue. Therefore, double heterozygote status would be  
344 equivalent to single-carrier status. Other case reports, case series and review of  
345 case reports also suggested that double heterozygote status was not  
346 associated with more severe phenotype <sup>48, 55, 56</sup>. In contrast, Randall et al.  
347 (1998) <sup>57</sup> observed LOH in both genes in ovarian tumors, perhaps signaling that  
348 the pathogenic events in each tissue are different and not always *BRCA1*  
349 mutations are equivalent to *BRCA2* counterparts.

350         However, more recent large surveys have been suggesting that double  
351 heterozygote have different phenotypes when compared to single heterozygote  
352 individuals. A large survey of 8162 German families with breast/ovarian cancer  
353 cases found eight double heterozygote individuals. They observed that they  
354 were younger at the onset of their first cancer episode when compared with  
355 their single heterozygote relatives and had more severe disease <sup>58</sup>. A worldwide  
356 survey of 32,295 women compared the clinical history of double heterozygote  
357 individuals with breast cancer to their single heterozygote counterparts. The  
358 same was done for ovarian cancer cases. They observed that clinical  
359 characteristics of double heterozygote individuals resemble phenotypes from  
360 *BRCA1*-only single heterozygotes, but tumor LOH microsatellite markers  
361 patterns are intermediate to the patterns of *BRCA1*-only single heterozygote  
362 and *BRCA2*-only single heterozygote. Thus, the authors suggest that the joint



363 effect of *BRCA1/BRCA2* variants are compatible with an additive model <sup>47</sup>.  
364 Another recent study also suggests that the double heterozygote phenotype  
365 more closely resembled that of *BRCA1* mutation carriers with poor prognosis  
366 factors and proposed a co-dominant model for the joint effects <sup>59</sup>.

367 In summary, *BRCA1/BRCA2* double heterozygote may have early onset  
368 of disease and the phenotype is perhaps similar to the “severe end of spectrum  
369 of *BRCA1* mutation carriership” <sup>48</sup>. We found a single *BRCA1/BRCA2* double  
370 heterozygote woman in our sample. She presented personal history of breast  
371 cancer. Since she is in her late 40s, her first cancer case must have happened  
372 much earlier, however, detailed data on her phenotype is currently lacking.

373 Literature on *BRCA*/other genes double heterozygotes is sparser. Thus,  
374 comparison with our results was difficult due to the possible different  
375 combinations of variants. For example, Sokolenko et al. (2014) <sup>60</sup> found seven  
376 digenic combinations double heterozygotes among *BRCA1* and other DNA  
377 double-strand repair genes (*BRCA1/CHEK2*, *BRCA1/ATM*, *BRCA1/BLM*,  
378 *CHEK2/BLM*, *CHEK2/ATM*, *NBS1/ATM*, and *NBS1/BLM*) in Russian patients:  
379 none were observed in our study. They did not observe differences from single  
380 heterozygote individuals. In contrast, a case series including a German  
381 *BRCA1/PALB2* double heterozygous patient had no early onset but had severe  
382 disease (multifocal triple negative ductal carcinoma) <sup>61</sup>. Another case report  
383 presented a case of a double heterozygote *APC/MLH1* man with  
384 Kashmir/Egyptian ancestry, which had a history of six jejunal cancers <sup>62</sup>.  
385 Therefore, double heterozygosity may have unusual effects on cancer  
386 phenotypes. However, we did not find *APC/MLH1* double heterozygous, but

387 found an individual *APC/TP53* double heterozygote, so it is another case  
388 warranting further investigation.

389 Perhaps the joint effects of non-*BRCA* variants can be explained in an  
390 additive manner as well. Thus, some combinations will result in severe  
391 phenotypes while others will not, due to the specific penetrance of each variant.  
392 It seems that non-*BRCA* double heterozygotes will need to be analyzed on a  
393 case-by-case basis.

394 We found that NCCN 1.2020 criteria missed a substantial proportion of  
395 patients that had pathogenic/likely pathogenic variants. Other authors observed  
396 the same. We found that NCCN criteria missed a substantial proportion of  
397 patients that had pathogenic/likely pathogenic variants. Other authors observed  
398 the same. For example, Grindedal et al. (2017)<sup>63</sup> investigated *BRCA* mutations  
399 in a Norwegian breast cancer cohort and assessed some testing criteria,  
400 including NCCN, and found a false negative rate of 15.8%. Yang et al. (2018)<sup>64</sup>  
401 investigated 4196 patients genotyped with 40- to 80- genes panels and showed  
402 a false negative rate of 13.5% with NCCN criteria. Both were not much far from  
403 our estimate of 17% with NCCN 1.2020/3.2019.

404 Other authors proposed changes to NCCN criteria. Alemar et al. (2017)  
405<sup>34</sup> found that adding criteria that are not included in the NCCN and ANS criteria  
406 (e.g. some ASCO criteria<sup>65, 66</sup>) achieved a higher predictive value, while other  
407 authors compared other four algorithms (BOADICEA<sup>67, 68</sup>, BRCAPRO, Myriad  
408<sup>69</sup> and Manchester score<sup>70</sup>) and observed that the pedigree-based BOADICEA  
409 most accurately predicted *BRCA1/BRCA2* variant carrier status in a  
410 Southeastern Brazilian population<sup>71</sup>. Although NCCN criteria were imperfect,  
411 ANS criteria fared worse and a reformulation is warranted.

412           Recently, a panel of Brazilian experts proposed recommendations for  
413 improving testing criteria for HBOC risk patients in Brazil. Besides modifying  
414 testing criteria, the expert panel also recommended offering risk-reducing  
415 surgeries for positive patients. For negative patients, investigating both maternal  
416 and paternal lineages is warranted, so the result of models estimating cancer  
417 risk can be communicated to the patient. They also suggested that VUS should  
418 always be reported and periodically reassessed, but no urgent clinical action is  
419 justified since most VUS are constantly reclassified to benign/likely benign  
420 categories. Furthermore, patients should be contacted whenever any update in  
421 testing protocols or management options should appear <sup>72</sup>.

422           Our study had some limitations. The NGS panel detects small deletions  
423 and duplications up to 17 base-pairs, but large deletions and duplications are  
424 not detected by this methodology. Other structural chromosomal changes, such  
425 as inversions and translocations are not detected either. If some of these  
426 changes are suspected, we recommend using methodologies like array CGH,  
427 MLPA, qPCR or FISH to confirm the variant found. Expansion variants of  
428 trinucleotide repeats, deep intronic variants or regulatory regions such as  
429 promoters are not detectable in the present test. Epigenetic changes are also  
430 not detectable by this test. At least for *BRCA* genes though, large  
431 rearrangements seem to be uncommon in Brazilian populations <sup>35, 42</sup>. Moreover,  
432 further phenotype information was missing for several patients, precluding  
433 further analyses.

## 434 Conclusion

435 In conclusion, we genotyped 1682 Brazilian individuals with clinical  
436 criteria of hereditary cancer syndrome from all regions of the country with NGS  
437 multigenic panels suited for the detection of germline pathogenic variants  
438 associated with cancer susceptibility, making it the largest Brazilian study of this  
439 nature to date. We observed several *BRCA1* and *BRCA2* recurrent mutations,  
440 confirming their presence in the Brazilian mutational spectrum and generated  
441 data for other 30 genes and 110 variants with modest penetrance. We also  
442 estimated the prevalence of *BRCA* as well as non-*BRCA* double heterozygotes  
443 in the Brazilian population. More studies are necessary to discover the  
444 implication of transheterozygosity over the phenotype of affected individuals.  
445

## 446 Appendix

447 **Table A.1.** Genotyped genes.

448 **Table A.2.** Ancestry, genetic findings summary, testing criteria, personal and  
449 family history.

450 **Table A.3.** Genetic Findings.

451 **Table A.4.** Positivity rate per gene or combination of genes, alongside number  
452 of unique pathogenic/likely pathogenic variants detected in each gene. The  
453 variants are detailed for transheterozygotes.

454 **Table A.5.** Patients per Brazilian state.

## 455 References

- 456 1. Samadder NJ, Giridhar KV, Baffy N, Riegert-Johnson D, Couch FJ.  
457 Hereditary Cancer Syndromes-A Primer on Diagnosis and Management: Part 1:  
458 Breast-Ovarian Cancer Syndromes. *Mayo Clin Proc.* Jun 2019;94(6):1084-1098.  
459 doi:10.1016/j.mayocp.2019.02.017
- 460 2. Nagy R, Sweet K, Eng C. Highly penetrant hereditary cancer syndromes.  
461 *Oncogene.* 2004;23(38):6445-6470. doi:10.1038/sj.onc.1207714

- 462 3. Zelli V, Compagnoni C, Cannita K, et al. Applications of Next Generation  
463 Sequencing to the Analysis of Familial Breast/Ovarian Cancer. *High Throughput*.  
464 Jan 10 2020;9(1)doi:10.3390/ht9010001
- 465 4. Xuan J, Yu Y, Qing T, Guo L, Shi L. Next-generation sequencing in the  
466 clinic: Promises and challenges. *Cancer Letters*. 2013;340(2):284-295.  
467 doi:10.1016/j.canlet.2012.11.025
- 468 5. Yohe S, Thyagarajan B. Review of Clinical Next-Generation Sequencing.  
469 *Archives of Pathology & Laboratory Medicine*. 2017;141(11):1544-1557.  
470 doi:10.5858/arpa.2016-0501-ra
- 471 6. Machado PM, Brandao RD, Cavaco BM, et al. Screening for a BRCA2  
472 rearrangement in high-risk breast/ovarian cancer families: evidence for a founder  
473 effect and analysis of the associated phenotypes. *J Clin Oncol*. May 20  
474 2007;25(15):2027-34. doi:10.1200/JCO.2006.06.9443
- 475 7. Richards S, Aziz N, Bale S, et al. Standards and guidelines for the  
476 interpretation of sequence variants: a joint consensus recommendation of the  
477 American College of Medical Genetics and Genomics and the Association for  
478 Molecular Pathology. *Genet Med*. May 2015;17(5):405-24.  
479 doi:10.1038/gim.2015.30
- 480 8. Biesecker LG, Harrison SM, ClinGen Sequence Variant Interpretation  
481 Working G. The ACMG/AMP reputable source criteria for the interpretation of  
482 sequence variants. *Genet Med*. Dec 2018;20(12):1687-1688.  
483 doi:10.1038/gim.2018.42
- 484 9. Karczewski KJ, Francioli LC, Tiao G, et al. The mutational constraint  
485 spectrum quantified from variation in 141,456 humans. *Nature*. 2020/05/01  
486 2020;581(7809):434-443. doi:10.1038/s41586-020-2308-7
- 487 10. Karczewski KJ, Weisburd B, Thomas B, et al. The ExAC browser:  
488 displaying reference data information from over 60 000 exomes. *Nucleic Acids  
489 Research*. 2017;45(D1):D840-D845. doi:10.1093/nar/gkw971
- 490 11. A global reference for human genetic variation. *Nature*.  
491 2015;526(7571):68-74. doi:10.1038/nature15393
- 492 12. Landrum MJ, Lee JM, Benson M, et al. ClinVar: improving access to  
493 variant interpretations and supporting evidence. *Nucleic Acids Research*.  
494 2018;46(D1):D1062-D1067. doi:10.1093/nar/gkx1153
- 495 13. Fokkema IFAC, Taschner PEM, Schaafsma GCP, Celli J, Laros JFJ, Den  
496 Dunnen JT. LOVD v.2.0: the next generation in gene variant databases. *Human  
497 Mutation*. 2011;32(5):557-563. doi:10.1002/humu.21438
- 498 14. Organization WH. WHO report on cancer: setting priorities, investing  
499 wisely and providing care for all. 2020.
- 500 15. Instituto Nacional de Câncer José Alencar Gomes da Silva. Ministério da  
501 Saúde. Estimativa 2020: incidência de câncer no Brasil. Rio de Janeiro: Instituto  
502 Nacional de Câncer José Alencar Gomes da Silva; 2019. p. 120.
- 503 16. Yoshida R. Hereditary breast and ovarian cancer (HBOC): review of its  
504 molecular characteristics, screening, treatment, and prognosis. *Breast Cancer*.  
505 Aug 29 2020;doi:10.1007/s12282-020-01148-2
- 506 17. Suwinski P, Ong C, Ling MHT, Poh YM, Khan AM, Ong HS. Advancing  
507 Personalized Medicine Through the Application of Whole Exome Sequencing and  
508 Big Data Analytics. *Front Genet*. 2019;10:49. doi:10.3389/fgene.2019.00049
- 509 18. Alemar B, Herzog J, Brinckmann Oliveira Netto C, et al. Prevalence of  
510 Hispanic BRCA1 and BRCA2 mutations among hereditary breast and ovarian  
511 cancer patients from Brazil reveals differences among Latin American

- 512 populations. *Cancer Genet.* Sep 2016;209(9):417-422.  
513 doi:10.1016/j.cancergen.2016.06.008
- 514 19. Dillenburger CV, Bandeira IC, Tubino TV, et al. Prevalence of 185delAG and  
515 5382insC mutations in BRCA1, and 6174delT in BRCA2 in women of Ashkenazi  
516 Jewish origin in southern Brazil. *Genet Mol Biol.* Jul 2012;35(3):599-602.  
517 doi:10.1590/S1415-47572012000400009
- 518 20. Cipriano NM, Jr., de Brito AM, de Oliveira ES, et al. Mutation screening of  
519 TP53, CHEK2 and BRCA genes in patients at high risk for hereditary breast and  
520 ovarian cancer (HBOC) in Brazil. *Breast Cancer.* May 2019;26(3):397-405.  
521 doi:10.1007/s12282-018-00938-z
- 522 21. Susswein LR, Marshall ML, Nusbaum R, et al. Pathogenic and likely  
523 pathogenic variant prevalence among the first 10,000 patients referred for next-  
524 generation cancer panel testing. *Genet Med.* Aug 2016;18(8):823-32.  
525 doi:10.1038/gim.2015.166
- 526 22. Sugano K, Nakamura S, Ando J, et al. Cross-sectional analysis of germline  
527 BRCA1 and BRCA2 mutations in Japanese patients suspected to have hereditary  
528 breast/ovarian cancer. *Cancer Sci.* Oct 2008;99(10):1967-76.  
529 doi:10.1111/j.1349-7006.2008.00944.x
- 530 23. Okano M, Nomizu T, Tachibana K, et al. The relationship between BRCA-  
531 associated breast cancer and age factors: an analysis of the Japanese HBOC  
532 consortium database. *J Hum Genet.* Mar 2021;66(3):307-314.  
533 doi:10.1038/s10038-020-00849-y
- 534 24. Lourenço JJ, Vargas FR, Bines J, et al. BRCA1 mutations in Brazilian  
535 patients. *Genetics and Molecular Biology.* 2004;27:500-504.
- 536 25. Dufloth RM, Carvalho S, Heinrich JK, et al. Analysis of BRCA1 and BRCA2  
537 mutations in Brazilian breast cancer patients with positive family history. *Sao*  
538 *Paulo Med J.* Jul 7 2005;123(4):192-7. doi:10.1590/s1516-31802005000400007
- 539 26. Gomes MC, Costa MM, Borojevic R, et al. Prevalence of BRCA1 and  
540 BRCA2 mutations in breast cancer patients from Brazil. *Breast Cancer Res Treat.*  
541 Jul 2007;103(3):349-53. doi:10.1007/s10549-006-9378-6
- 542 27. Esteves VF, Thuler LC, Amendola LC, et al. Prevalence of BRCA1 and  
543 BRCA2 gene mutations in families with medium and high risk of breast and  
544 ovarian cancer in Brazil. *Braz J Med Biol Res.* May 2009;42(5):453-7.  
545 doi:10.1590/s0100-879x2009000500009
- 546 28. Ewald IP, Izetti P, Vargas FR, et al. Prevalence of the BRCA1 founder  
547 mutation c.5266dupin Brazilian individuals at-risk for the hereditary breast and  
548 ovarian cancer syndrome. *Hered Cancer Clin Pract.* Dec 20 2011;9(1):12.  
549 doi:10.1186/1897-4287-9-12
- 550 29. Carraro DM, Koike Figueira MA, Garcia Lisboa BC, et al. Comprehensive  
551 analysis of BRCA1, BRCA2 and TP53 germline mutation and tumor  
552 characterization: a portrait of early-onset breast cancer in Brazil. *PLoS One.*  
553 2013;8(3):e57581. doi:10.1371/journal.pone.0057581
- 554 30. Silva FC, Lisboa BC, Figueiredo MC, et al. Hereditary breast and ovarian  
555 cancer: assessment of point mutations and copy number variations in Brazilian  
556 patients. *BMC Med Genet.* May 15 2014;15:55. doi:10.1186/1471-2350-15-55
- 557 31. Fernandes GC, Michelli RA, Galvão HC, et al. Prevalence of  
558 BRCA1/BRCA2 mutations in a Brazilian population sample at-risk for hereditary  
559 breast cancer and characterization of its genetic ancestry. *Oncotarget.* Dec 6  
560 2016;7(49):80465-80481. doi:10.18632/oncotarget.12610



- 561 32. Maistro S, Teixeira N, Encinas G, et al. Germline mutations in BRCA1 and  
562 BRCA2 in epithelial ovarian cancer patients in Brazil. *BMC cancer*. Dec 3  
563 2016;16(1):934. doi:10.1186/s12885-016-2966-x
- 564 33. de Oliveira ES, Soares BL, Lemos S, et al. Screening of the BRCA1 gene  
565 in Brazilian patients with breast and/or ovarian cancer via high-resolution melting  
566 reaction analysis. Article. *Fam Cancer*. Apr 2016;15(2):173-181.  
567 doi:10.1007/s10689-015-9858-0
- 568 34. Alemar B, Gregório C, Herzog J, et al. BRCA1 and BRCA2 mutational  
569 profile and prevalence in hereditary breast and ovarian cancer (HBOC) probands  
570 from Southern Brazil: Are international testing criteria appropriate for this specific  
571 population? *PLOS ONE*. 2017;12(11):e0187630.  
572 doi:10.1371/journal.pone.0187630
- 573 35. Palmero EI, Carraro DM, Alemar B, et al. The germline mutational  
574 landscape of BRCA1 and BRCA2 in Brazil. *Sci Rep*. Jun 15 2018;8(1):9188.  
575 doi:10.1038/s41598-018-27315-2
- 576 36. Brianese RC, Nakamura KDM, Almeida F, et al. BRCA1 deficiency is a  
577 recurrent event in early-onset triple-negative breast cancer: a comprehensive  
578 analysis of germline mutations and somatic promoter methylation. *Breast Cancer*  
579 *Res Treat*. Feb 2018;167(3):803-814. doi:10.1007/s10549-017-4552-6
- 580 37. Cotrim DP, Ribeiro ARG, Paixão D, et al. Prevalence of BRCA1 and  
581 BRCA2 pathogenic and likely pathogenic variants in non-selected ovarian  
582 carcinoma patients in Brazil. *BMC cancer*. Jan 3 2019;19(1):4.  
583 doi:10.1186/s12885-018-5235-3
- 584 38. Bandeira G, Rocha K, Lazar M, et al. Germline variants of Brazilian women  
585 with breast cancer and detection of a novel pathogenic ATM deletion in early-  
586 onset breast cancer. *Breast Cancer*. Sep 28 2020;doi:10.1007/s12282-020-  
587 01165-1
- 588 39. Da Costa E Silva Carvalho S, Cury NM, Brotto DB, et al. Germline variants  
589 in DNA repair genes associated with hereditary breast and ovarian cancer  
590 syndrome: analysis of a 21 gene panel in the Brazilian population. *BMC Medical*  
591 *Genomics*. 2020;13(1)doi:10.1186/s12920-019-0652-y
- 592 40. Felix GE, Abe-Sandes C, Machado-Lopes TM, et al. Germline mutations  
593 in BRCA1, BRCA2, CHEK2 and TP53 in patients at high-risk for HBOC:  
594 characterizing a Northeast Brazilian Population. *Hum Genome Var*.  
595 2014;1:14012. doi:10.1038/hgv.2014.12
- 596 41. Rebbeck TR, Friebel TM, Friedman E, et al. Mutational spectrum in a  
597 worldwide study of 29,700 families with BRCA1 or BRCA2 mutations. *Hum Mutat*.  
598 May 2018;39(5):593-620. doi:10.1002/humu.23406
- 599 42. Ewald IP, Cossio SL, Palmero EI, et al. BRCA1 and BRCA2  
600 rearrangements in Brazilian individuals with Hereditary Breast and Ovarian  
601 Cancer Syndrome. *Genet Mol Biol*. Apr-Jun 2016;39(2):223-31.  
602 doi:10.1590/1678-4685-gmb-2014-0350
- 603 43. Felício PS, Grasel RS, Campacci N, et al. Whole-exome sequencing of  
604 non-BRCA1/BRCA2 mutation carrier cases at high-risk for hereditary  
605 breast/ovarian cancer. *Hum Mutat*. Dec 16 2020;doi:10.1002/humu.24158
- 606 44. Soares BL, Brant AC, Gomes R, et al. Screening for germline mutations in  
607 mismatch repair genes in patients with Lynch syndrome by next generation  
608 sequencing. *Fam Cancer*. Jul 2018;17(3):387-394. doi:10.1007/s10689-017-  
609 0043-5

- 610 45. Rosa RCA, Santis JO, Teixeira LA, et al. Lynch syndrome identification in  
611 a Brazilian cohort of endometrial cancer screened by a universal approach.  
612 *Gynecol Oncol.* Oct 2020;159(1):229-238. doi:10.1016/j.ygyno.2020.07.013
- 613 46. Gomes R, Spinola PDS, Brant AC, et al. Prevalence of germline variants  
614 in consensus moderate-to-high-risk predisposition genes to hereditary breast and  
615 ovarian cancer in BRCA1/2-negative Brazilian patients. *Breast Cancer Res Treat.*  
616 Oct 30 2020;doi:10.1007/s10549-020-05985-9
- 617 47. Rebbeck TR, Friebel TM, Mitra N, et al. Inheritance of deleterious  
618 mutations at both BRCA1 and BRCA2 in an international sample of 32,295  
619 women. *Breast Cancer Research.* Nov 11 2016;18112. doi:10.1186/s13058-016-  
620 0768-3
- 621 48. Leegte B, van der Hout AH, Deffenbaugh AM, et al. Phenotypic expression  
622 of double heterozygosity for BRCA1 and BRCA2 germline mutations. *J Med*  
623 *Genet.* Mar 2005;42(3):e20. doi:10.1136/jmg.2004.027243
- 624 49. Lavie O, Narod S, Lejbkowitz F, et al. Double heterozygosity in the BRCA1  
625 and BRCA2 genes in the Jewish population. *Ann Oncol.* Apr 2011;22(4):964-966.  
626 doi:10.1093/annonc/mdq460
- 627 50. Zuradelli M, Peissel B, Manoukian S, et al. Four new cases of double  
628 heterozygosity for BRCA1 and BRCA2 gene mutations: clinical, pathological, and  
629 family characteristics. *Breast Cancer Res Treat.* Nov 2010;124(1):251-8.  
630 doi:10.1007/s10549-010-0853-8
- 631 51. Noh JM, Choi DH, Nam SJ, et al. Characteristics of double heterozygosity  
632 for BRCA1 and BRCA2 germline mutations in Korean breast cancer patients.  
633 *Breast Cancer Res Treat.* Jan 2012;131(1):217-22. doi:10.1007/s10549-011-  
634 1718-5
- 635 52. Friedman E, Bar-Sade Bruchim R, Kruglikova A, et al. Double  
636 heterozygotes for the Ashkenazi founder mutations in BRCA1 and BRCA2 genes.  
637 *Am J Hum Genet.* Oct 1998;63(4):1224-7. doi:10.1086/302040
- 638 53. Moslehi R, Russo D, Phelan C, Jack E, Antman K, Narod S. An unaffected  
639 individual from a breast/ovarian cancer family with germline mutations in both  
640 BRCA1 and BRCA2. *Clin Genet.* Jan 2000;57(1):70-3. doi:10.1034/j.1399-  
641 0004.2000.570111.x
- 642 54. Bell DW, Erban J, Sgroi DC, Haber DA. Selective loss of heterozygosity in  
643 multiple breast cancers from a carrier of mutations in both BRCA1 and BRCA2.  
644 *Cancer Res.* May 15 2002;62(10):2741-3.
- 645 55. Thiffault I, Hamel N, Pal T, et al. Germline truncating mutations in both  
646 MSH2 and BRCA2 in a single kindred. *Br J Cancer.* Jan 26 2004;90(2):483-91.  
647 doi:10.1038/sj.bjc.6601424
- 648 56. Musolino A, Naldi N, Michiara M, et al. A breast cancer patient from Italy  
649 with germline mutations in both the BRCA1 and BRCA2 genes. *Breast Cancer*  
650 *Res Treat.* May 2005;91(2):203-5. doi:10.1007/s10549-004-7704-4
- 651 57. Randall TC, Bell KA, Rebane BA, Rubin SC, Boyd J. Germline mutations  
652 of the BRCA1 and BRCA2 genes in a breast and ovarian cancer patient. *Gynecol*  
653 *Oncol.* Sep 1998;70(3):432-4. doi:10.1006/gyno.1998.5081
- 654 58. Heidemann S, Fischer C, Engel C, et al. Double heterozygosity for  
655 mutations in BRCA1 and BRCA2 in German breast cancer patients: implications  
656 on test strategies and clinical management. *Breast Cancer Research and*  
657 *Treatment.* Aug 2012;134(3):1229-1239. doi:10.1007/s10549-012-2050-4
- 658 59. Le Page C, Rahimi K, Rodrigues M, et al. Clinicopathological features of  
659 women with epithelial ovarian cancer and double heterozygosity for BRCA1 and



- 660 BRCA2: A systematic review and case report analysis. *Gynecol Oncol*. Feb  
661 2020;156(2):377-386. doi:10.1016/j.ygyno.2019.11.019
- 662 60. Sokolenko AP, Bogdanova N, Kluzniak W, et al. Double heterozygotes  
663 among breast cancer patients analyzed for BRCA1, CHEK2, ATM, NBN/NBS1,  
664 and BLM germ-line mutations. *Breast Cancer Res Treat*. Jun 2014;145(2):553-  
665 62. doi:10.1007/s10549-014-2971-1
- 666 61. Pern F, Bogdanova N, Schürmann P, et al. Mutation analysis of BRCA1,  
667 BRCA2, PALB2 and BRD7 in a hospital-based series of German patients with  
668 triple-negative breast cancer. *PLoS One*. 2012;7(10):e47993.  
669 doi:10.1371/journal.pone.0047993
- 670 62. Lindor NM, Smyrk TC, Buehler S, et al. Multiple jejunal cancers resulting  
671 from combination of germline APC and MLH1 mutations. *Fam Cancer*. Dec  
672 2012;11(4):667-9. doi:10.1007/s10689-012-9561-3
- 673 63. Grindedal EM, Heramb C, Karsrud I, et al. Current guidelines for BRCA  
674 testing of breast cancer patients are insufficient to detect all mutation carriers.  
675 *BMC cancer*. 2017;17(1):438-438. doi:10.1186/s12885-017-3422-2
- 676 64. Yang S, Axilbund JE, O'Leary E, et al. Underdiagnosis of Hereditary  
677 Breast and Ovarian Cancer in Medicare Patients: Genetic Testing Criteria Miss  
678 the Mark. *Ann Surg Oncol*. Oct 2018;25(10):2925-2931. doi:10.1245/s10434-  
679 018-6621-4
- 680 65. Statement of the American Society of Clinical Oncology: genetic testing  
681 for cancer susceptibility, Adopted on February 20, 1996. *J Clin Oncol*. May  
682 1996;14(5):1730-6; discussion 1737-40. doi:10.1200/JCO.1996.14.5.1730
- 683 66. Lu KH, Wood ME, Daniels M, et al. American Society of Clinical Oncology  
684 Expert Statement: collection and use of a cancer family history for oncology  
685 providers. *J Clin Oncol*. Mar 10 2014;32(8):833-40.  
686 doi:10.1200/JCO.2013.50.9257
- 687 67. Antoniou AC, Pharoah PD, McMullan G, et al. A comprehensive model for  
688 familial breast cancer incorporating BRCA1, BRCA2 and other genes. *Br J*  
689 *Cancer*. Jan 7 2002;86(1):76-83. doi:10.1038/sj.bjc.6600008
- 690 68. Antoniou AC, Pharoah PP, Smith P, Easton DF. The BOADICEA model of  
691 genetic susceptibility to breast and ovarian cancer. *Br J Cancer*. Oct 18  
692 2004;91(8):1580-90. doi:10.1038/sj.bjc.6602175
- 693 69. Parmigiani G, Berry D, Aguilar O. Determining carrier probabilities for  
694 breast cancer-susceptibility genes BRCA1 and BRCA2. *Am J Hum Genet*. Jan  
695 1998;62(1):145-58. doi:10.1086/301670
- 696 70. Evans DG, Eccles DM, Rahman N, et al. A new scoring system for the  
697 chances of identifying a BRCA1/2 mutation outperforms existing models including  
698 BRCAPRO. *J Med Genet*. Jun 2004;41(6):474-80. doi:10.1136/jmg.2003.017996
- 699 71. Teixeira N, Maistro S, Del Pilar Estevez Diz M, et al. Predictability of  
700 BRCA1/2 mutation status in patients with ovarian cancer: How to select women  
701 for genetic testing in middle-income countries. *Maturitas*. Nov 2017;105:113-118.  
702 doi:10.1016/j.maturitas.2017.06.002
- 703 72. Achatz MI, Caleffi M, Guindalini R, Marques RM, Nogueira-Rodrigues A,  
704 Ashton-Prolla P. Recommendations for Advancing the Diagnosis and  
705 Management of Hereditary Breast and Ovarian Cancer in Brazil. *JCO Glob Oncol*.  
706 2020;6:439-452. doi:10.1200/JGO.19.00170
- 707

Table 1. Demographic and clinical characteristics of Brazilian individuals tested genotyped with NGS hereditary cancer panel.

| <b>Demographic</b>                         | <b>N</b> | <b>%</b> |
|--------------------------------------------|----------|----------|
| Sex                                        | 1682     | 100      |
| Female                                     | 1557     | 92.6     |
| Male                                       | 125      | 7.4      |
| <i>Age at diagnosis (years)</i>            |          |          |
| <30                                        | 79       | 4.7      |
| 30-40                                      | 452      | 26.9     |
| 41-50                                      | 526      | 31.3     |
| 51-65                                      | 465      | 27.6     |
| >65                                        | 160      | 9.5      |
| <i>Ethnicity</i>                           |          |          |
| Multiple ethnicities (admixed)             | 330      | 19.6     |
| White                                      | 259      | 15.4     |
| Black                                      | 26       | 1.5      |
| Jewish Ashkenazi                           | 22       | 1.3      |
| Native indigenous                          | 21       | 1.2      |
| Asian                                      | 17       | 1.0      |
| No information                             | 1007     | 59.9     |
| <i>Personal cancer history<sup>a</sup></i> |          |          |
| Overall                                    | 1126     | 66.9     |
| Breast or ovarian                          | 971      | 57.7     |
| Colorectal                                 | 71       | 4.2      |
| Thyroid/parathyroid                        | 36       | 2.1      |
| Prostate                                   | 15       | 0.9      |
| Stomach                                    | 14       | 0.8      |
| Uterus                                     | 13       | 0.8      |
| Kidney                                     | 13       | 0.8      |
| Sarcomas                                   | 13       | 0.8      |
| Leukemia                                   | 11       | 0.6      |
| Skin (non-melanoma)                        | 9        | 0.5      |
| Pancreas                                   | 9        | 0.5      |
| Other                                      | 17       | 1.0      |
| No cancer history                          | 268      | 15.9     |
| No information                             | 293      | 17.4     |

*Family cancer history (first-, second- or third-degree relatives)<sup>a</sup>*

|                     |      |      |
|---------------------|------|------|
| Overall             | 1182 | 70.3 |
| Breast or ovarian   | 973  | 57.8 |
| Colorectal          | 310  | 18.4 |
| Thyroid/parathyroid | 108  | 6.4  |
| Prostate            | 339  | 20.2 |
| Stomach             | 155  | 9.2  |
| Uterus              | 122  | 7.3  |
| Kidney              | 45   | 2.7  |
| Sarcomas            | 22   | 1.3  |
| Leukemia            | 139  | 8.3  |
| Skin (non-melanoma) | 72   | 4.3  |
| Pancreas            | 83   | 4.9  |
| Other               | 235  | 14.0 |
| No cancer history   | 163  | 9.7  |
| No information      | 337  | 20.0 |

<sup>a</sup> Number of individuals with personal history exceeds 1682 because some individuals reported multiple cancer types.

Table 2. NCCN 3.2019/1.2020 and Brazilian ANS testing criteria performance.

| Decision                         | NGS testing       |                       | <b>Row totals</b> |
|----------------------------------|-------------------|-----------------------|-------------------|
|                                  | Positive patients | VUS/Negative patients |                   |
| <i>NCCN 3.2019/1.2020</i>        |                   |                       |                   |
| At risk                          | 215               | 793                   | <b>1008</b>       |
| No risk                          | 45                | 323                   | <b>368</b>        |
| <b>Column totals</b>             | <b>260</b>        | <b>1116</b>           | <b>1376</b>       |
| Insufficient information:<br>306 |                   |                       |                   |
| <i>Brazilian ANS</i>             |                   |                       |                   |
| At risk                          | 145               | 515                   | <b>660</b>        |
| No risk                          | 115               | 576                   | <b>691</b>        |
| <b>Column totals</b>             | <b>260</b>        | <b>1091</b>           | <b>1351</b>       |
| Insufficient information:<br>331 |                   |                       |                   |

NCCN: sensitivity = 82.7%, specificity = 28.9%, false negative rate = 17.3%, F1-measure = 33.9%.

ANS: sensitivity = 55.8%, specificity = 52.8%, false negative rate = 44.2% F1-measure = 31.5%.

## Figure captions

Figure 1. Variants profiles. (A) Distribution of patients according to genetic findings. P/LP = patients with pathogenic/likely pathogenic, VUS = patients with variants of uncertain significance (N = 1682). (B) Distribution of P/LP variants per gene. (C) P/LP variants functional annotation. (D) Distribution of VUS per gene. Lynch syndrome genes have been grouped together in (C) and (D).

Figure 2. Heatmap representing the distribution of pathogenic/likely pathogenic (P/LP) transheterozygotes in the sample. The top line represents the number of patients in each column. The single heterozygotes (n=290) are distributed in the main diagonal. Transheterozygotes (n=15) are distributed in the inferior half (14 double-heterozygotes and 1 triple-heterozygote). The total number of variants are 321 ( $290 \times 1 + 14 \times 2 + 1 \times 3 = 321$ ).

**A**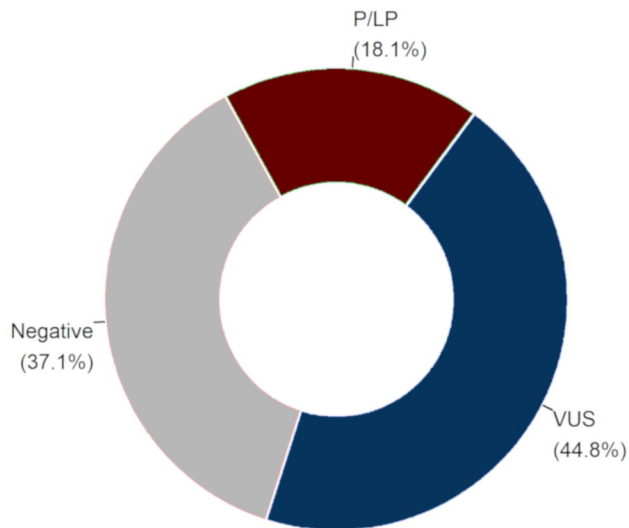**B**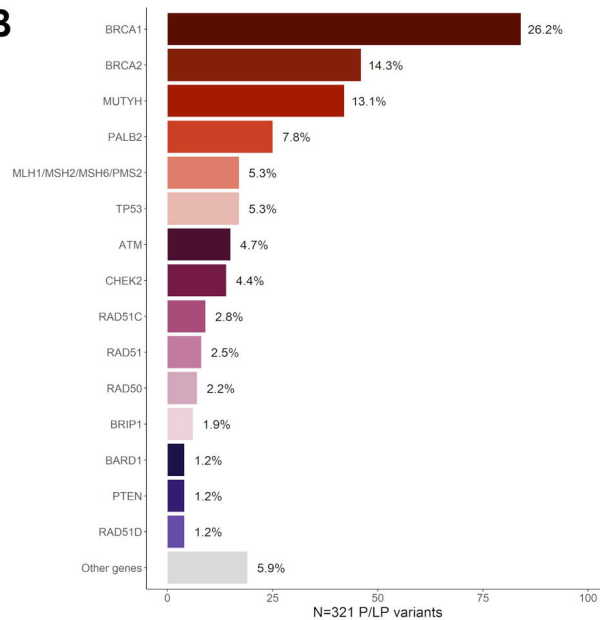**C**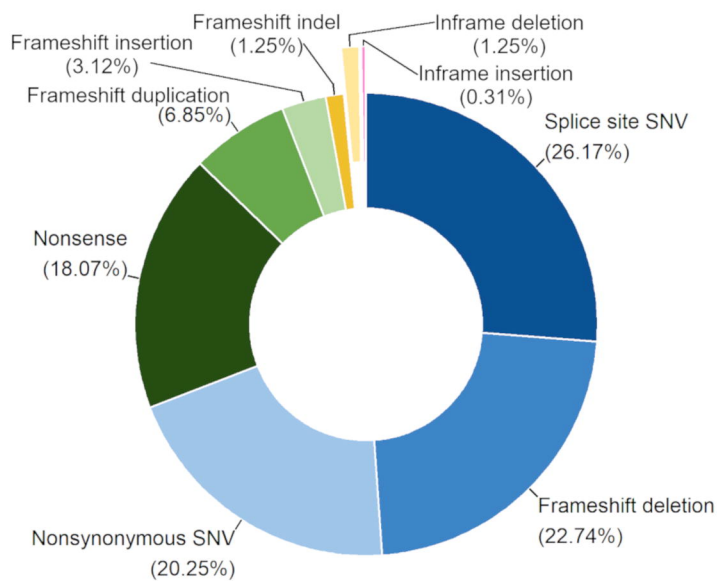**D**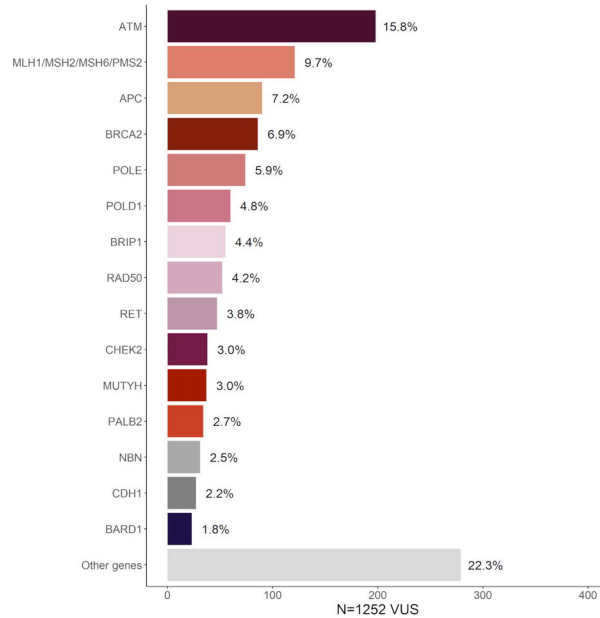

Total 305 patients, 321 P/LP patients

85 45 40 25 16 14 11 8 7 7 6 6 5 4 4 4 2 3 2 1 2 2 0 1 1 1 1 1 1 1 0 1

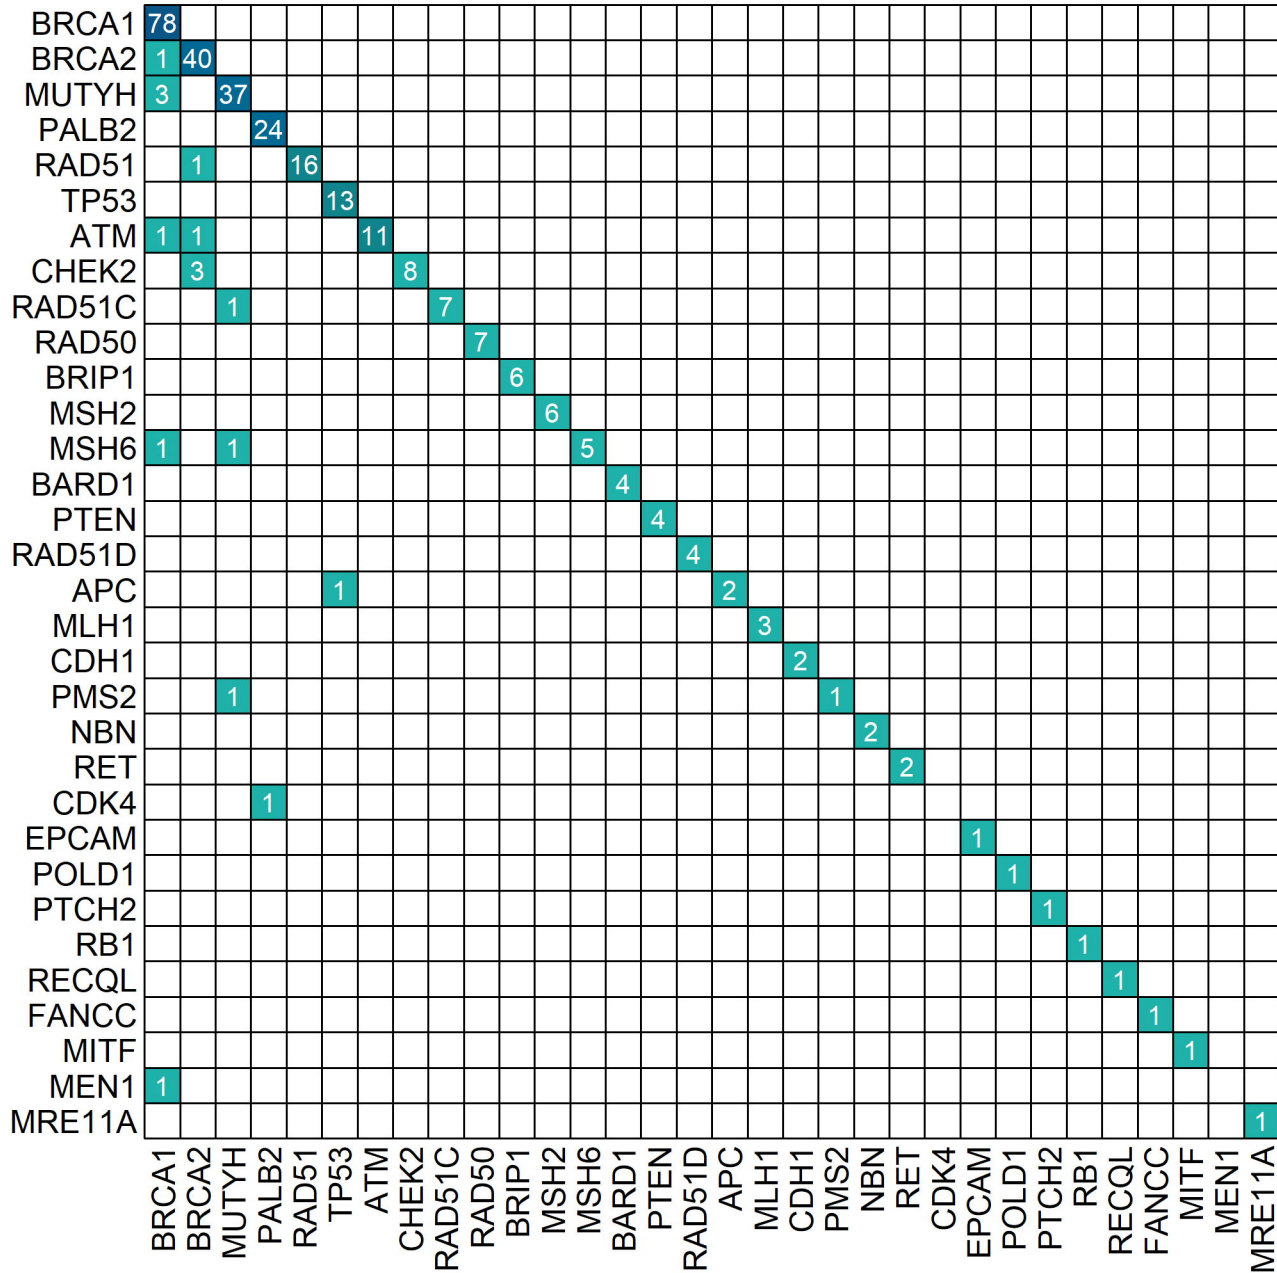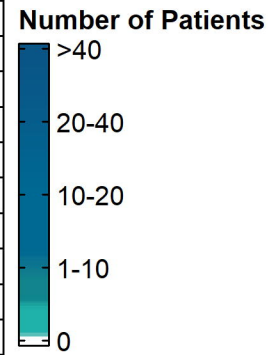

Source: https://medrxiv.org/content/10.1101/2021.04.15.21255554v1.full.pdf
